# Supplementary figures and images for: Abinitio thermodynamic model of Cu2ZnSnS4
Source: Royal Society of Chemistry journal article supplement (doi:10.1039/c4ta00892h), 2014-01-01

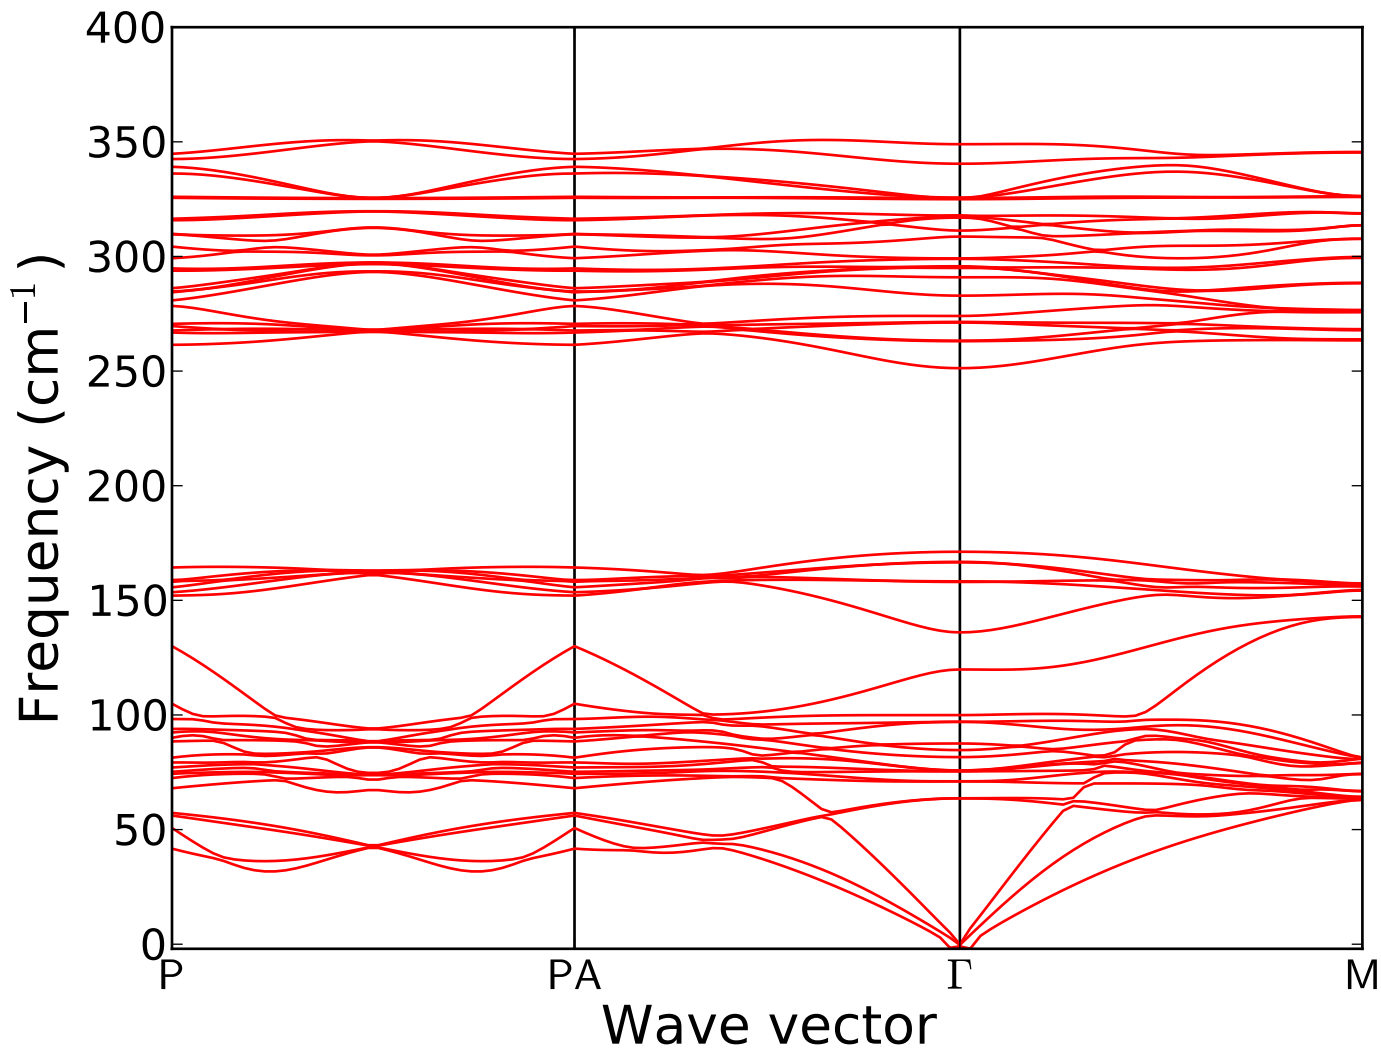

Supplement: c4ta00892h1.zip [file c4ta00892h1.zip]

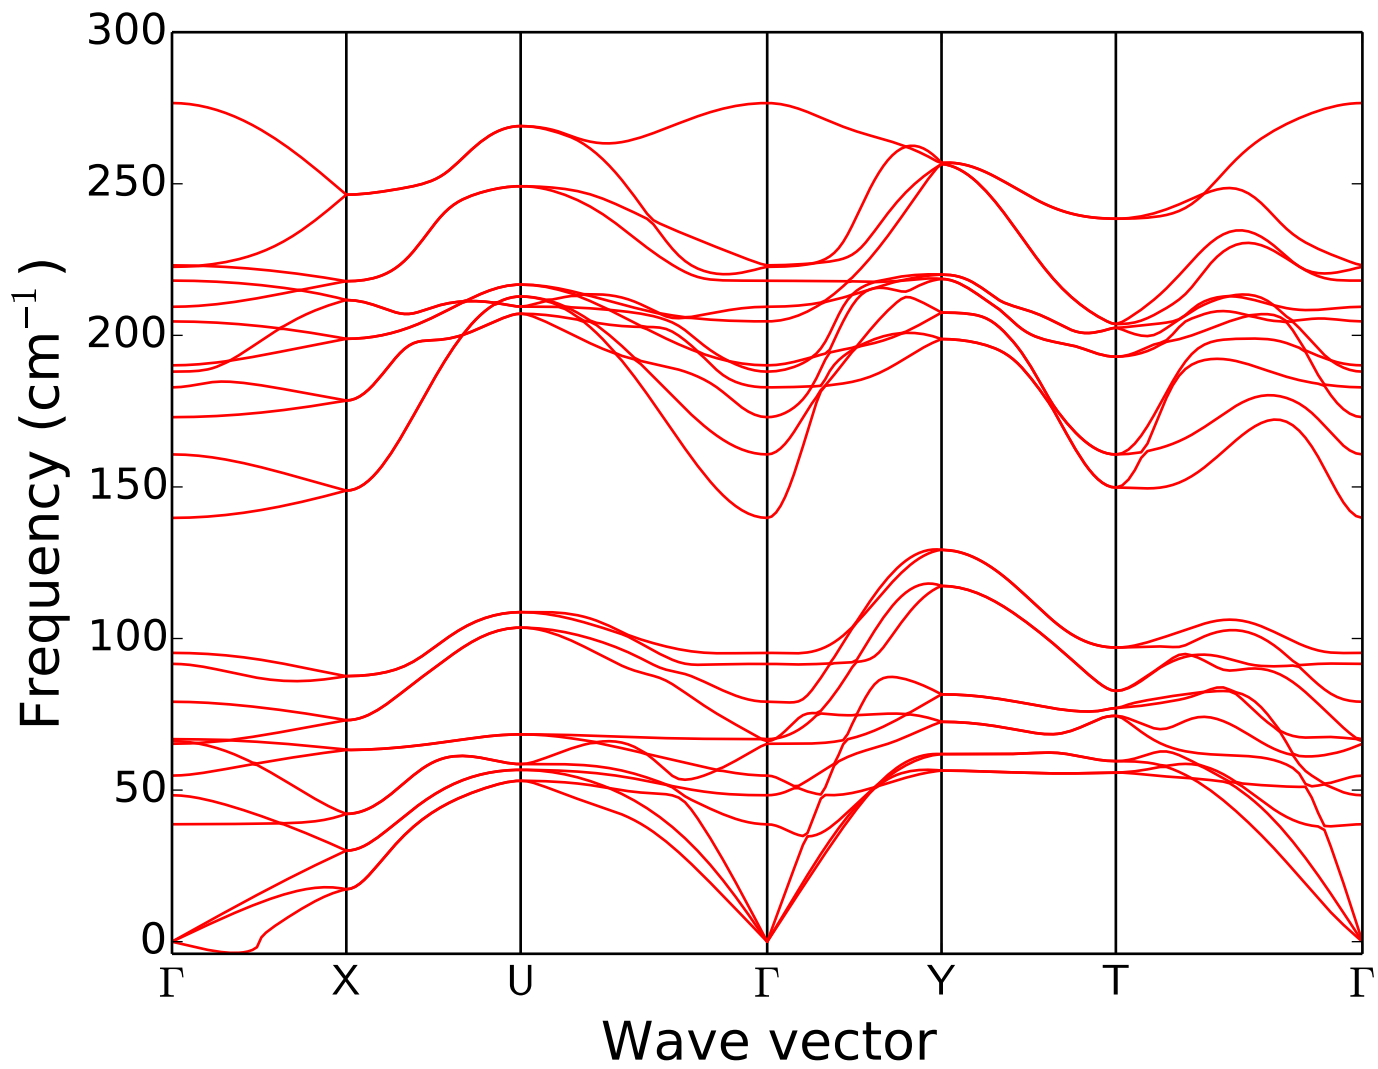

Supplement: c4ta00892h1.zip [file c4ta00892h1.zip]

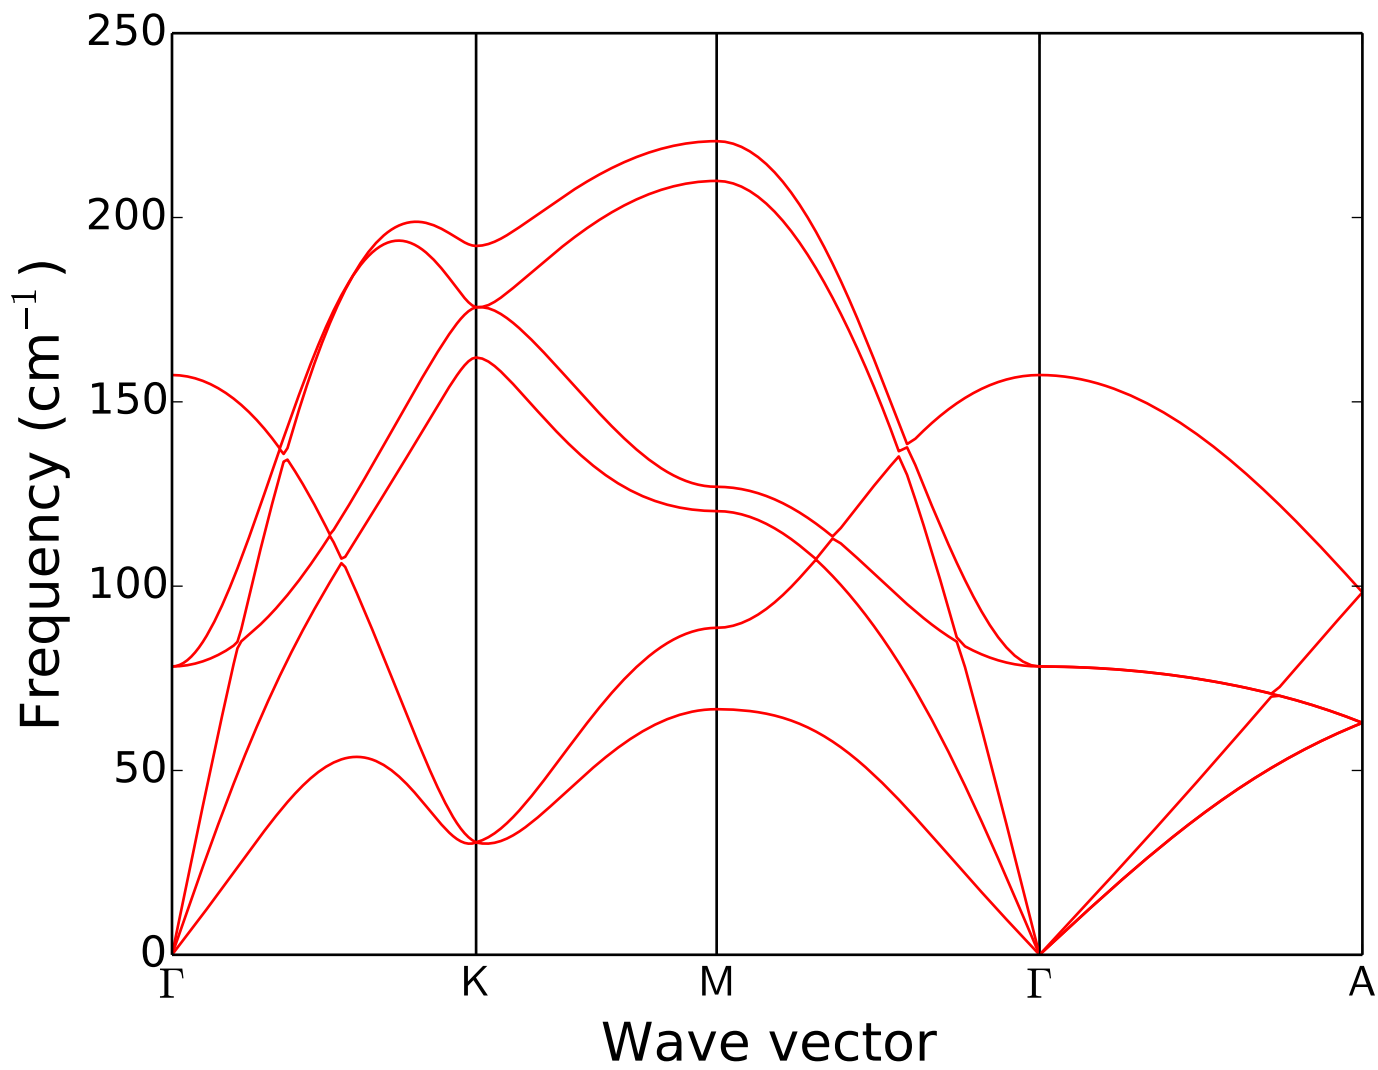

Supplement: c4ta00892h1.zip [file c4ta00892h1.zip]

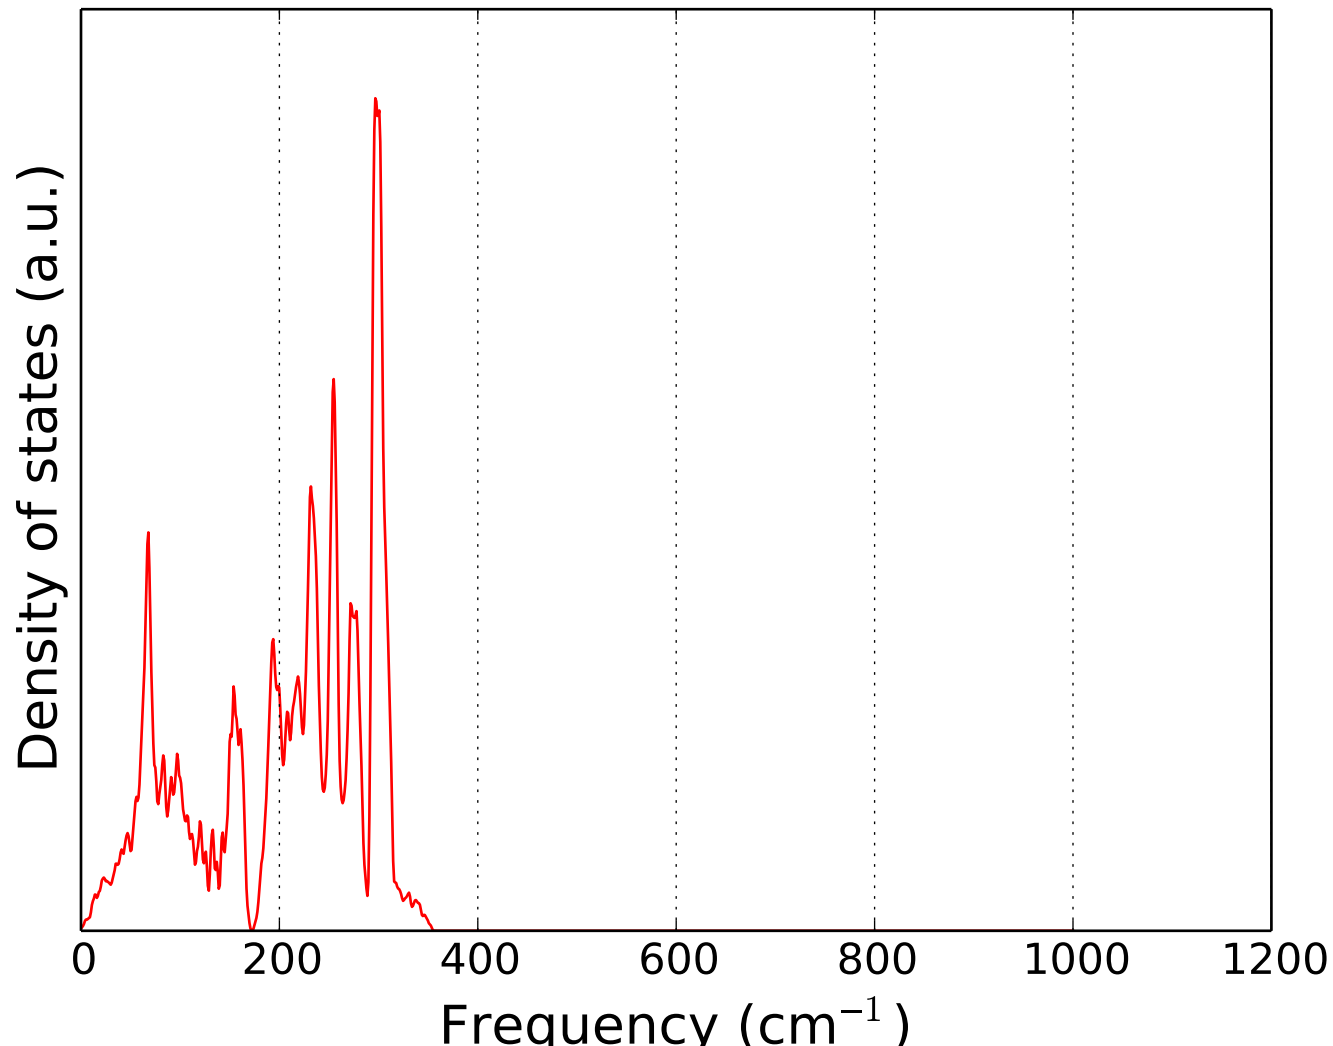

Supplement: c4ta00892h1.zip [file c4ta00892h1.zip]

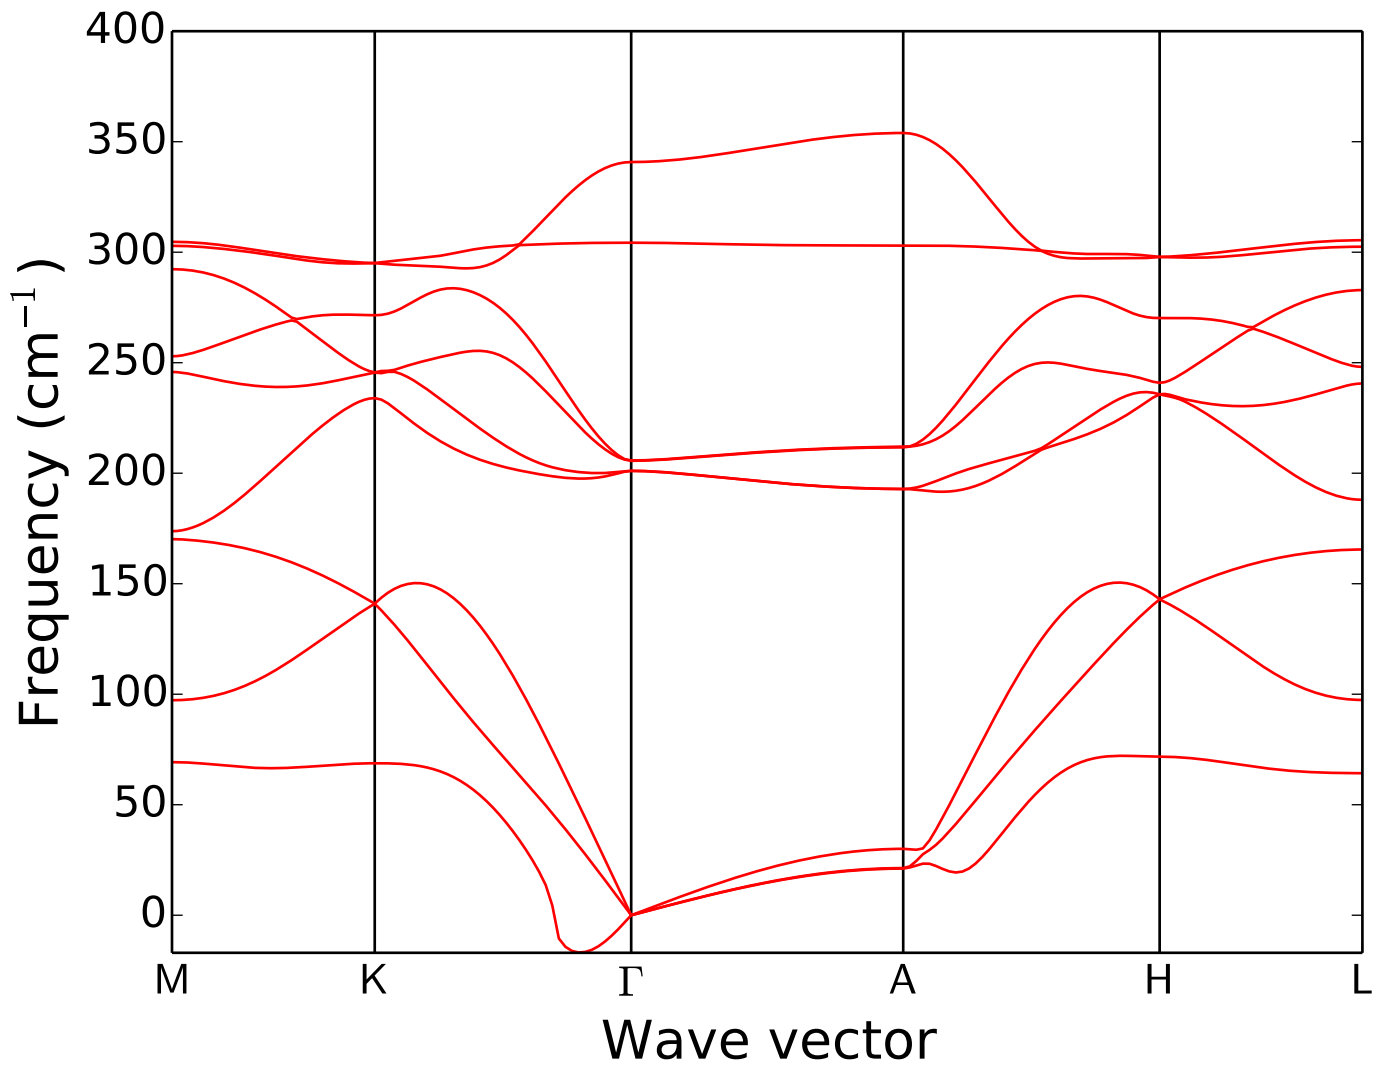

Supplement: c4ta00892h1.zip [file c4ta00892h1.zip]

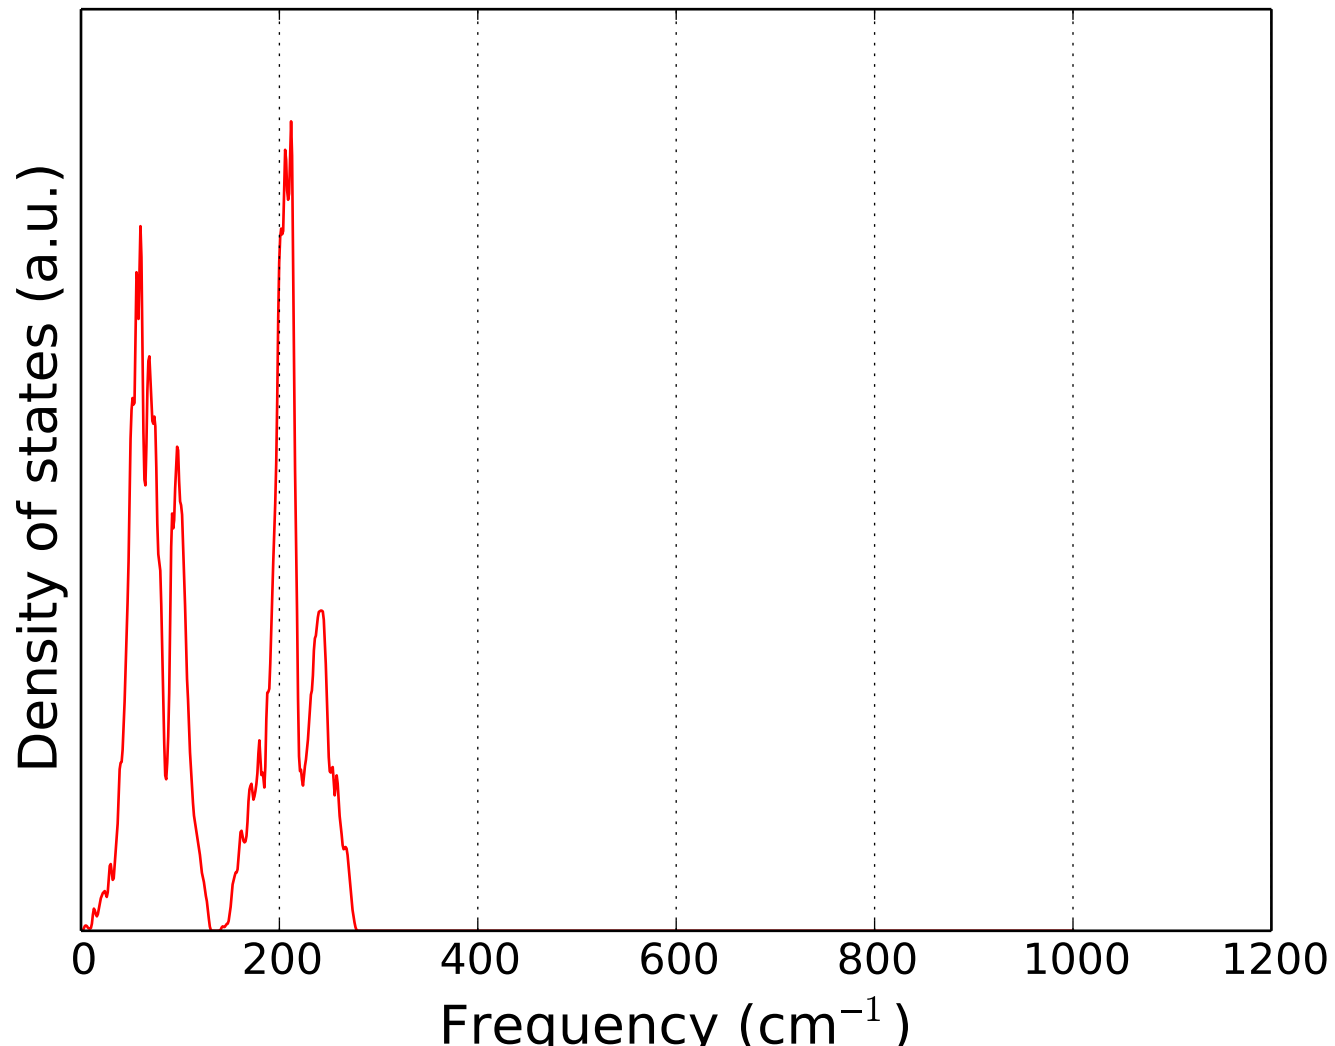

Supplement: c4ta00892h1.zip [file c4ta00892h1.zip]

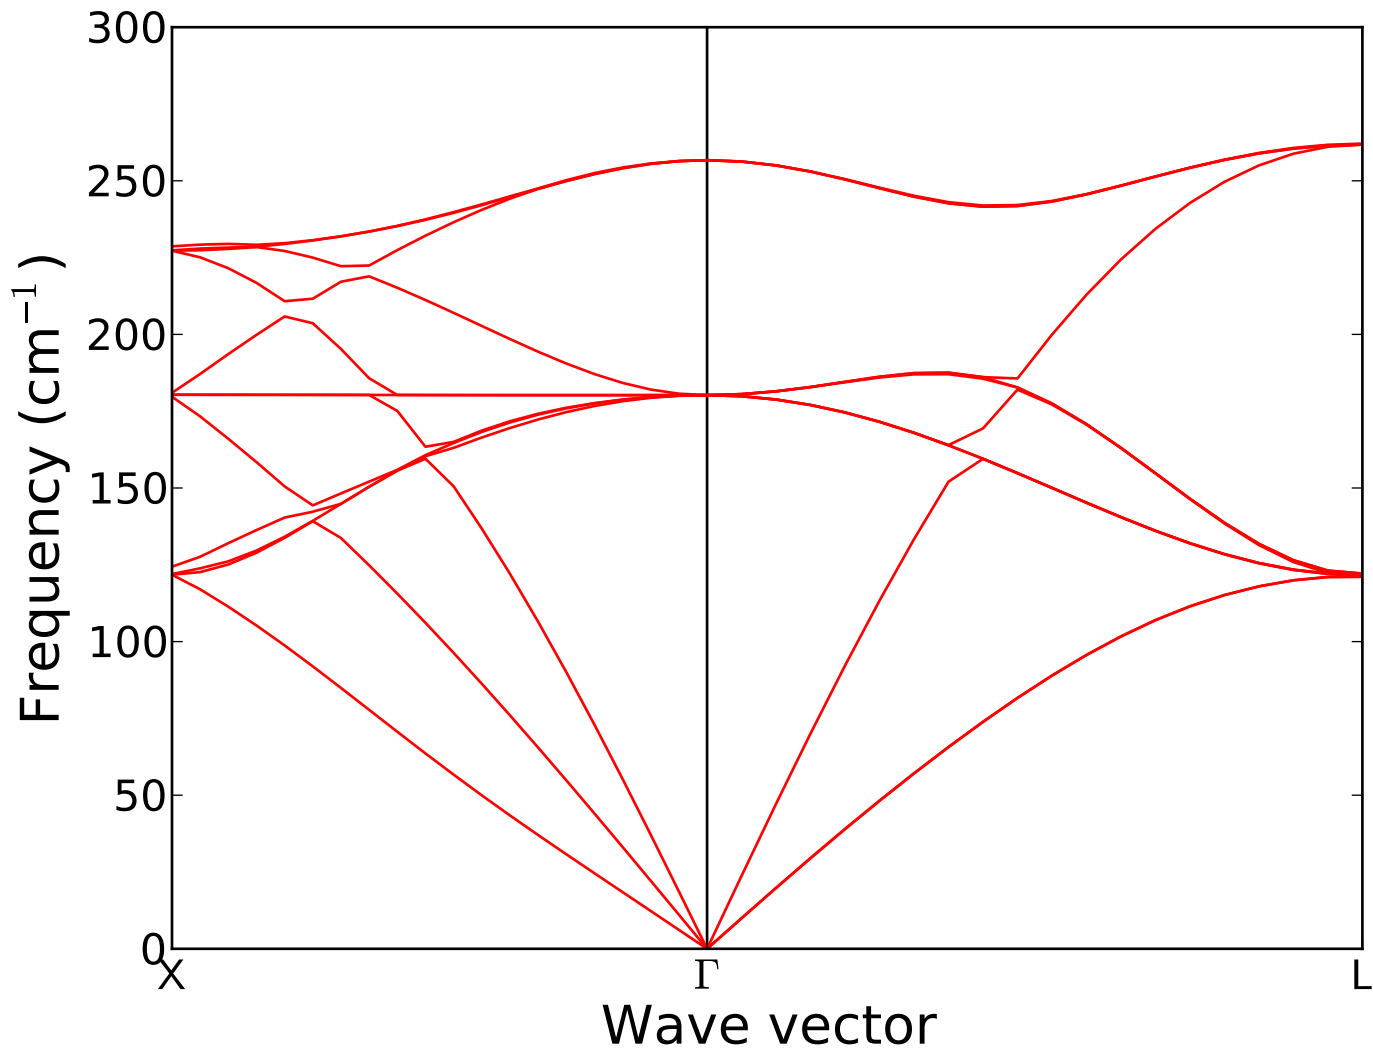

Supplement: c4ta00892h1.zip [file c4ta00892h1.zip]

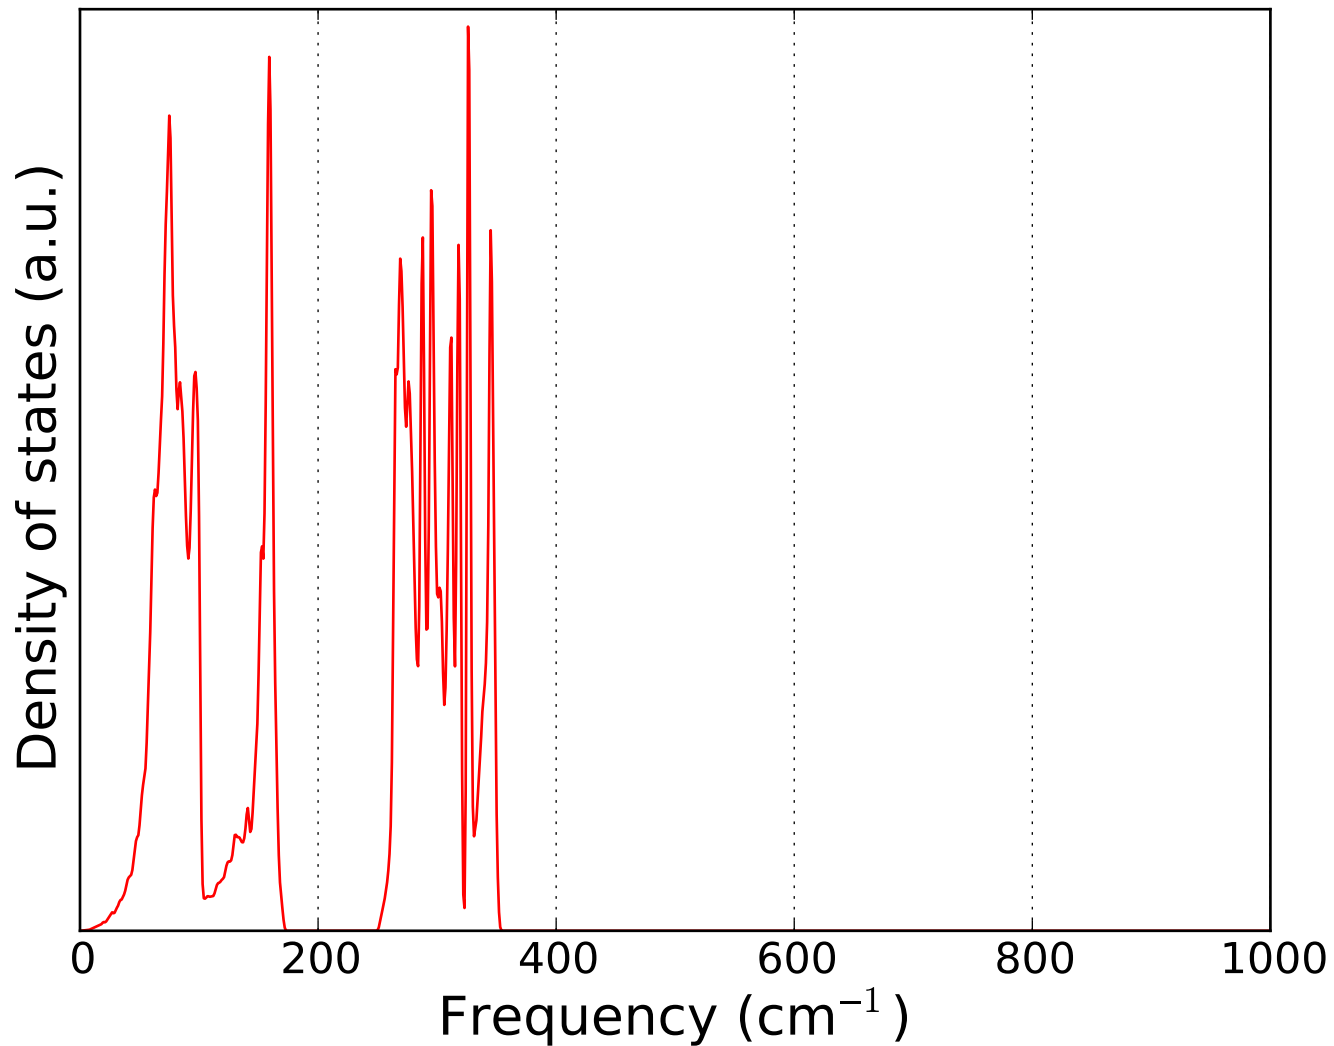

Supplement: c4ta00892h1.zip [file c4ta00892h1.zip]

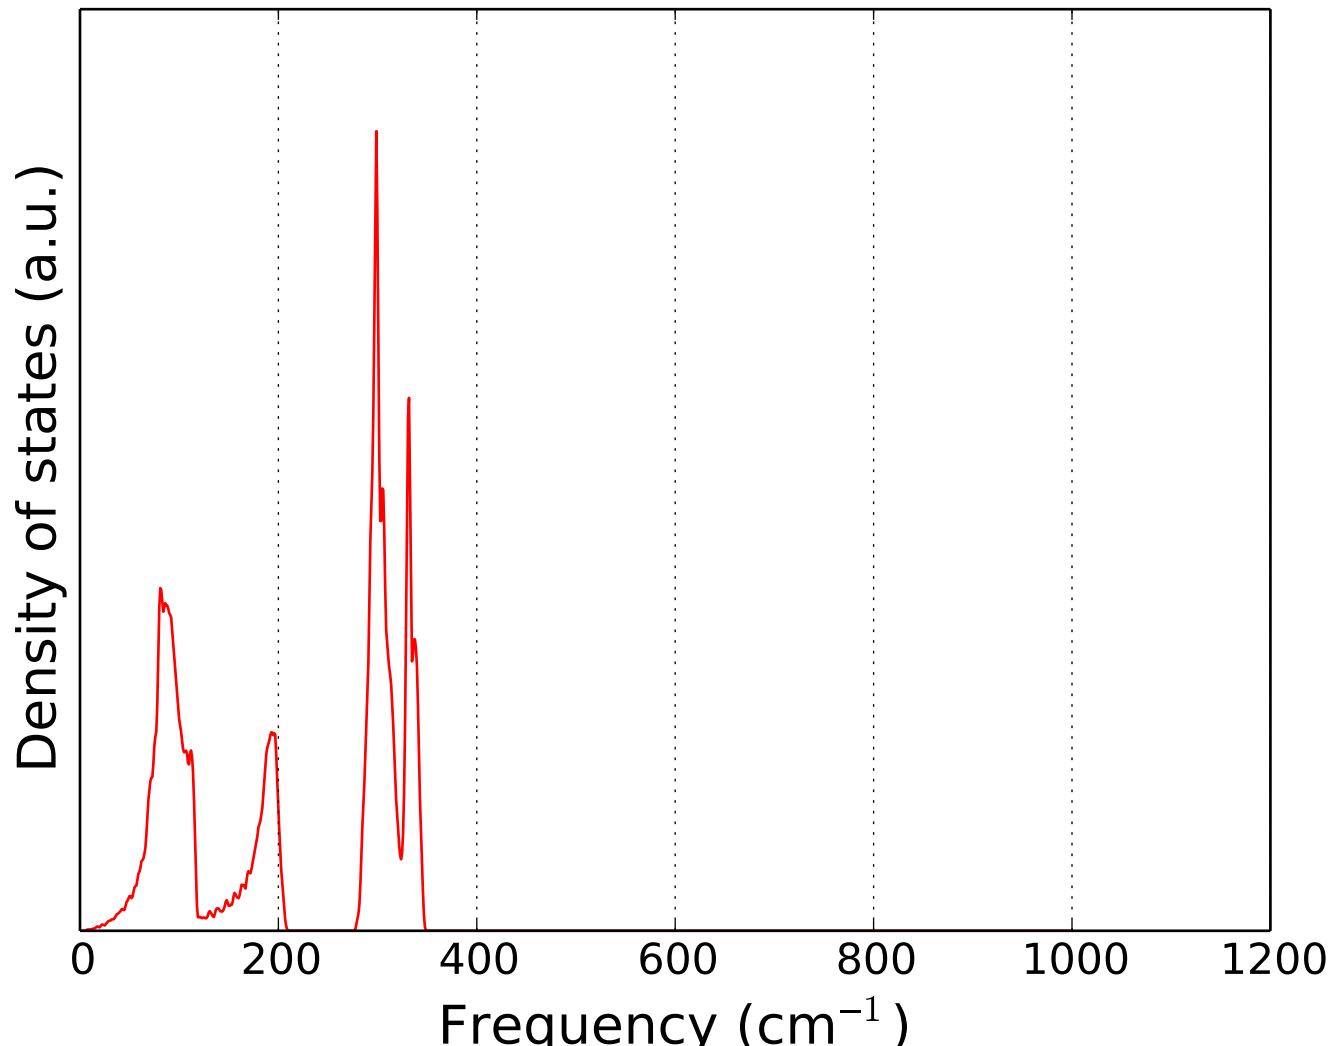

Supplement: c4ta00892h1.zip [file c4ta00892h1.zip]

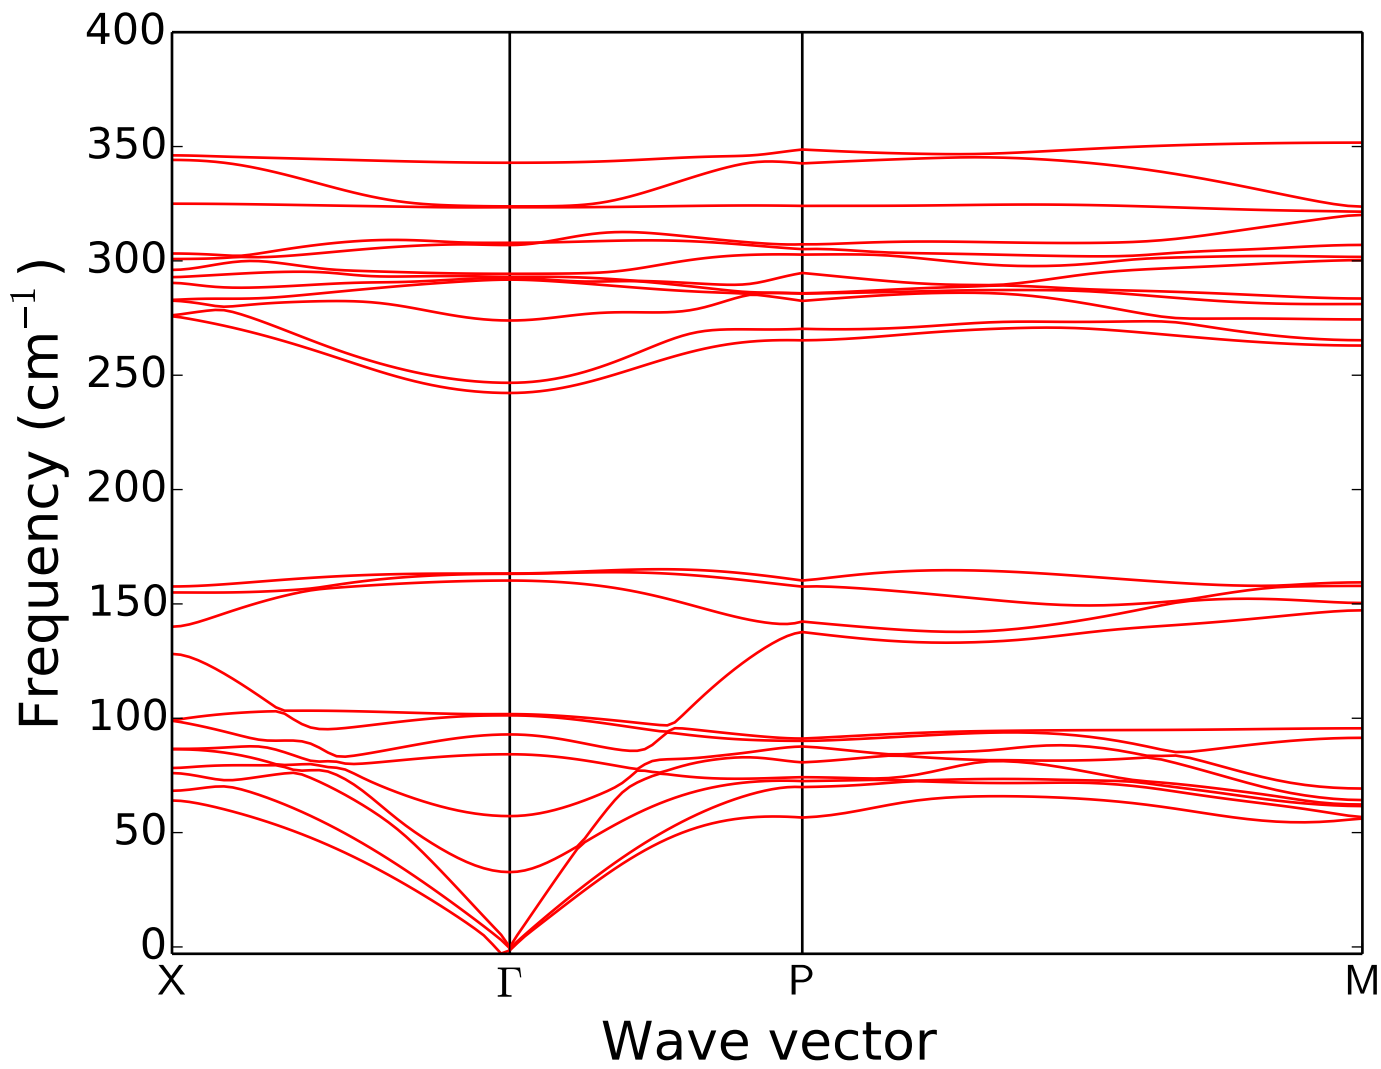

Supplement: c4ta00892h1.zip [file c4ta00892h1.zip]

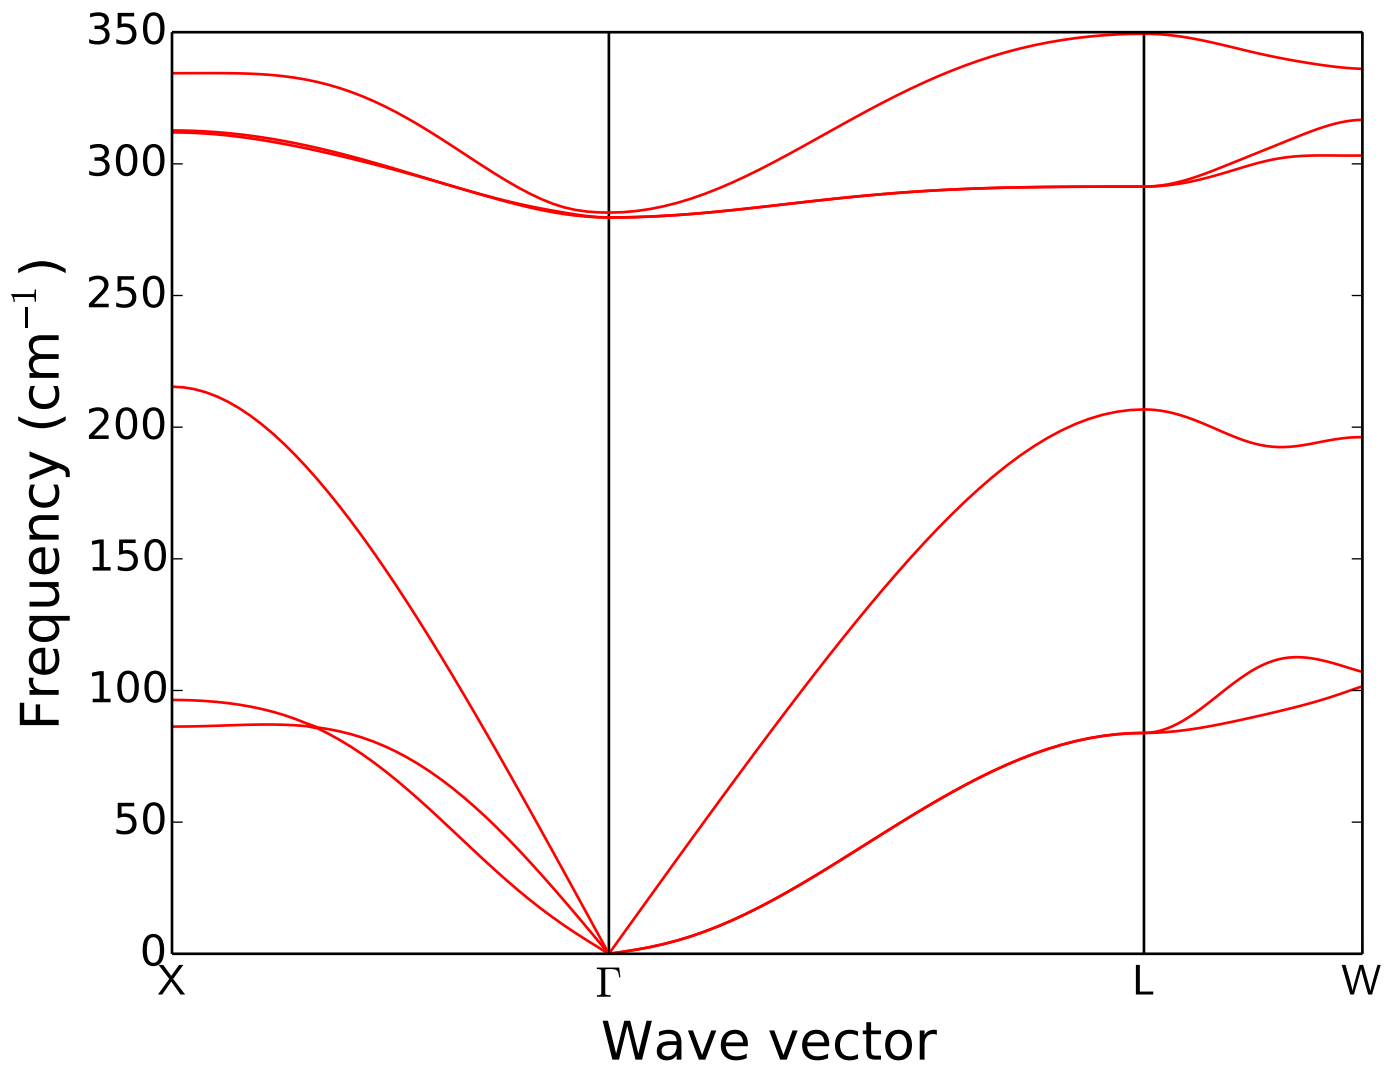

Supplement: c4ta00892h1.zip [file c4ta00892h1.zip]

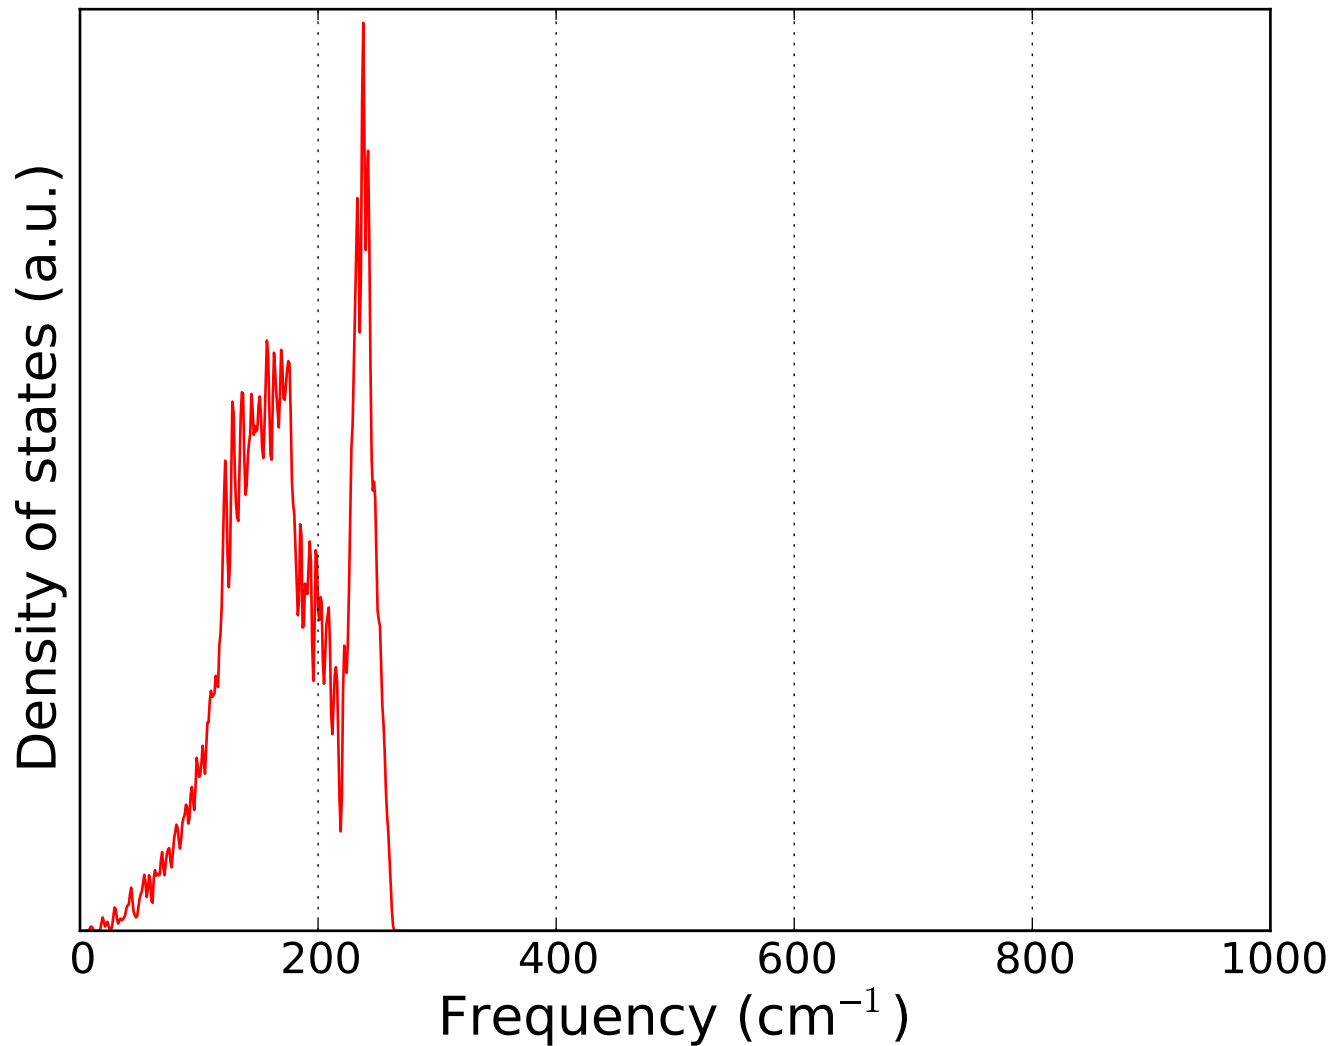

Supplement: c4ta00892h1.zip [file c4ta00892h1.zip]

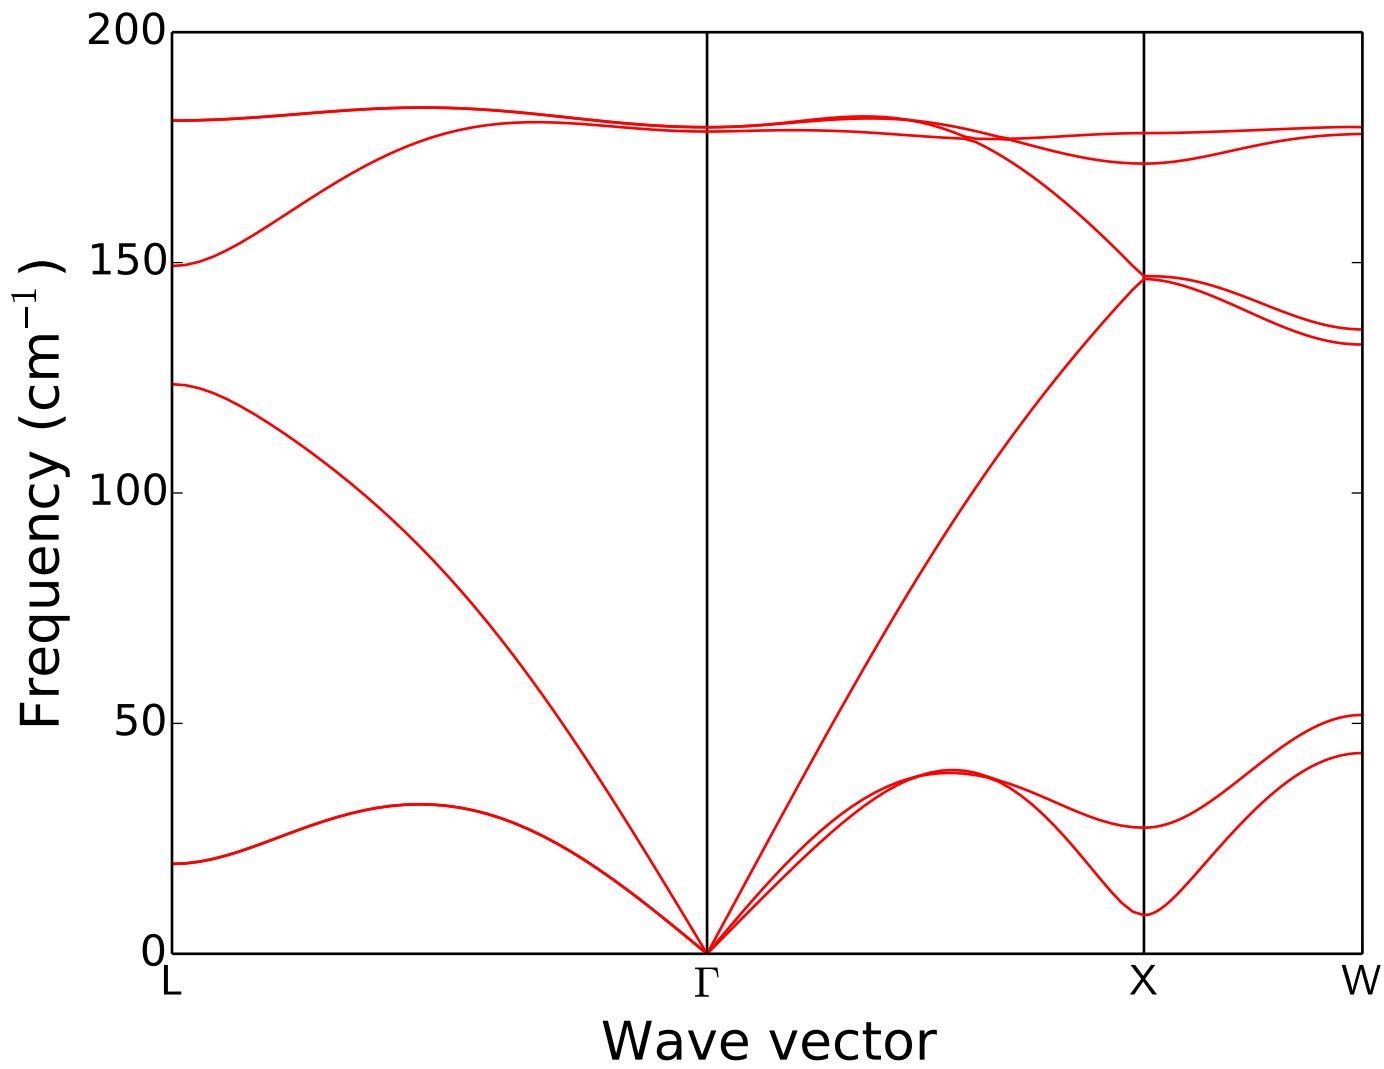

Supplement: c4ta00892h1.zip [file c4ta00892h1.zip]

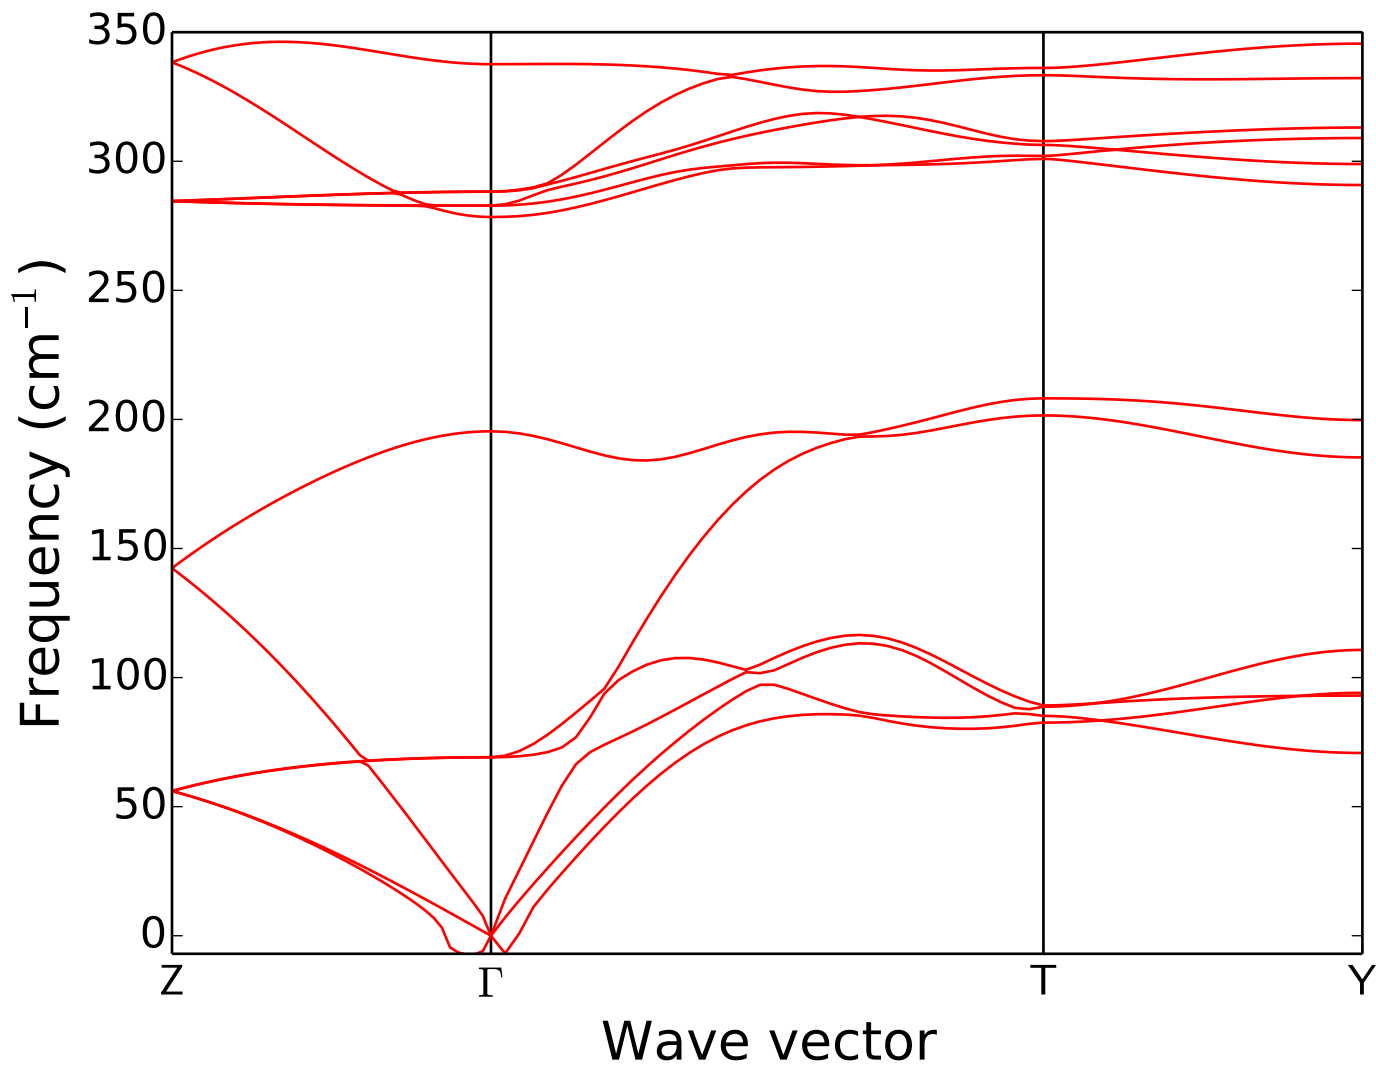

Supplement: c4ta00892h1.zip [file c4ta00892h1.zip]

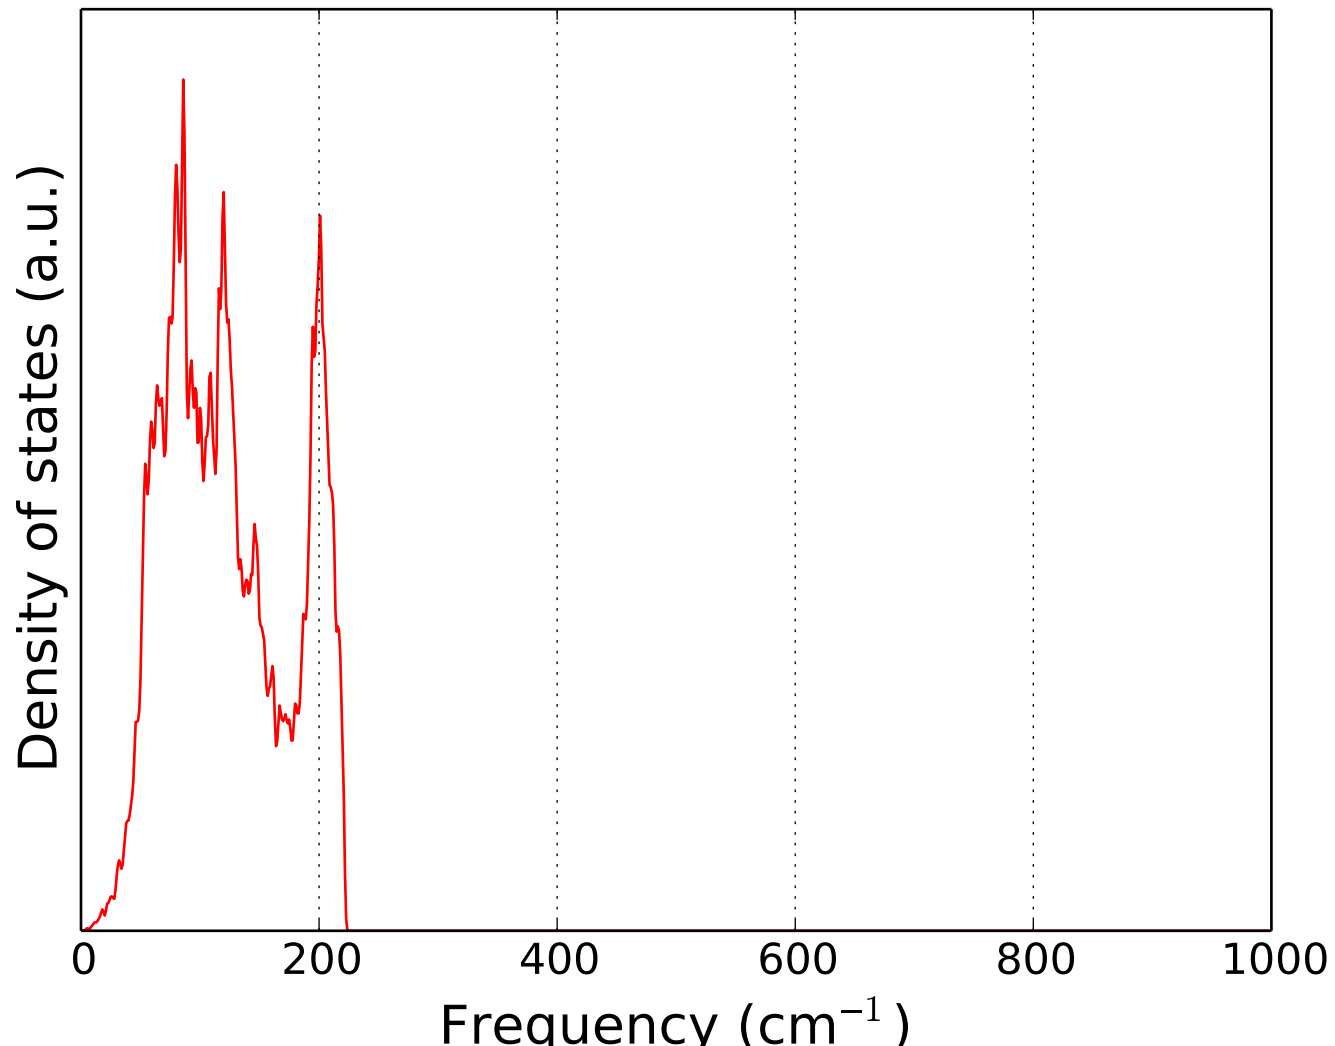

Supplement: c4ta00892h1.zip [file c4ta00892h1.zip]

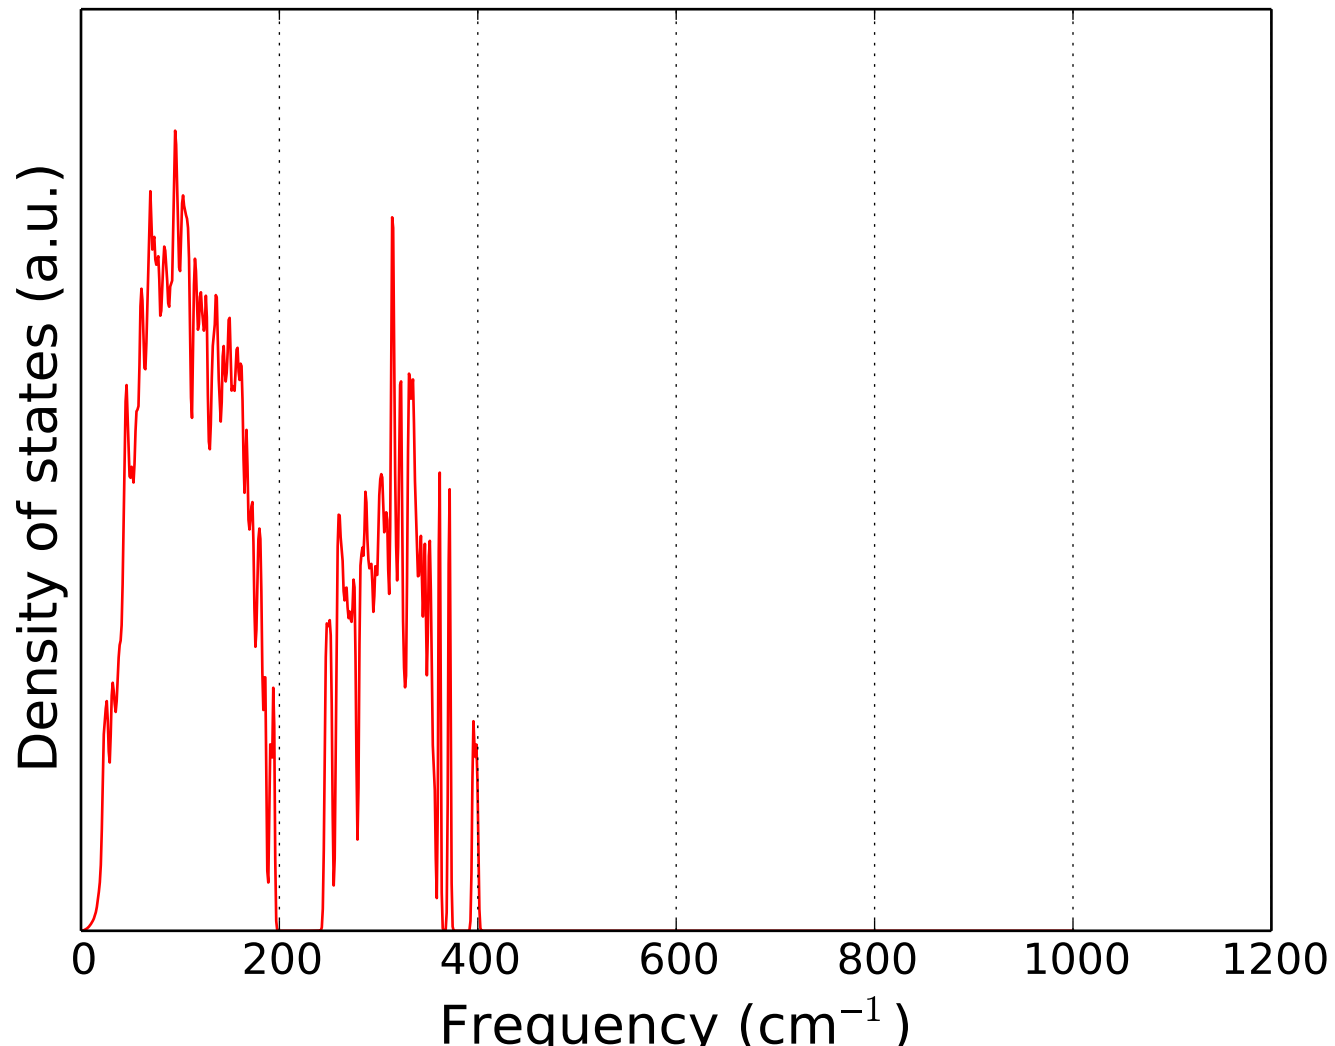

Supplement: c4ta00892h1.zip [file c4ta00892h1.zip]

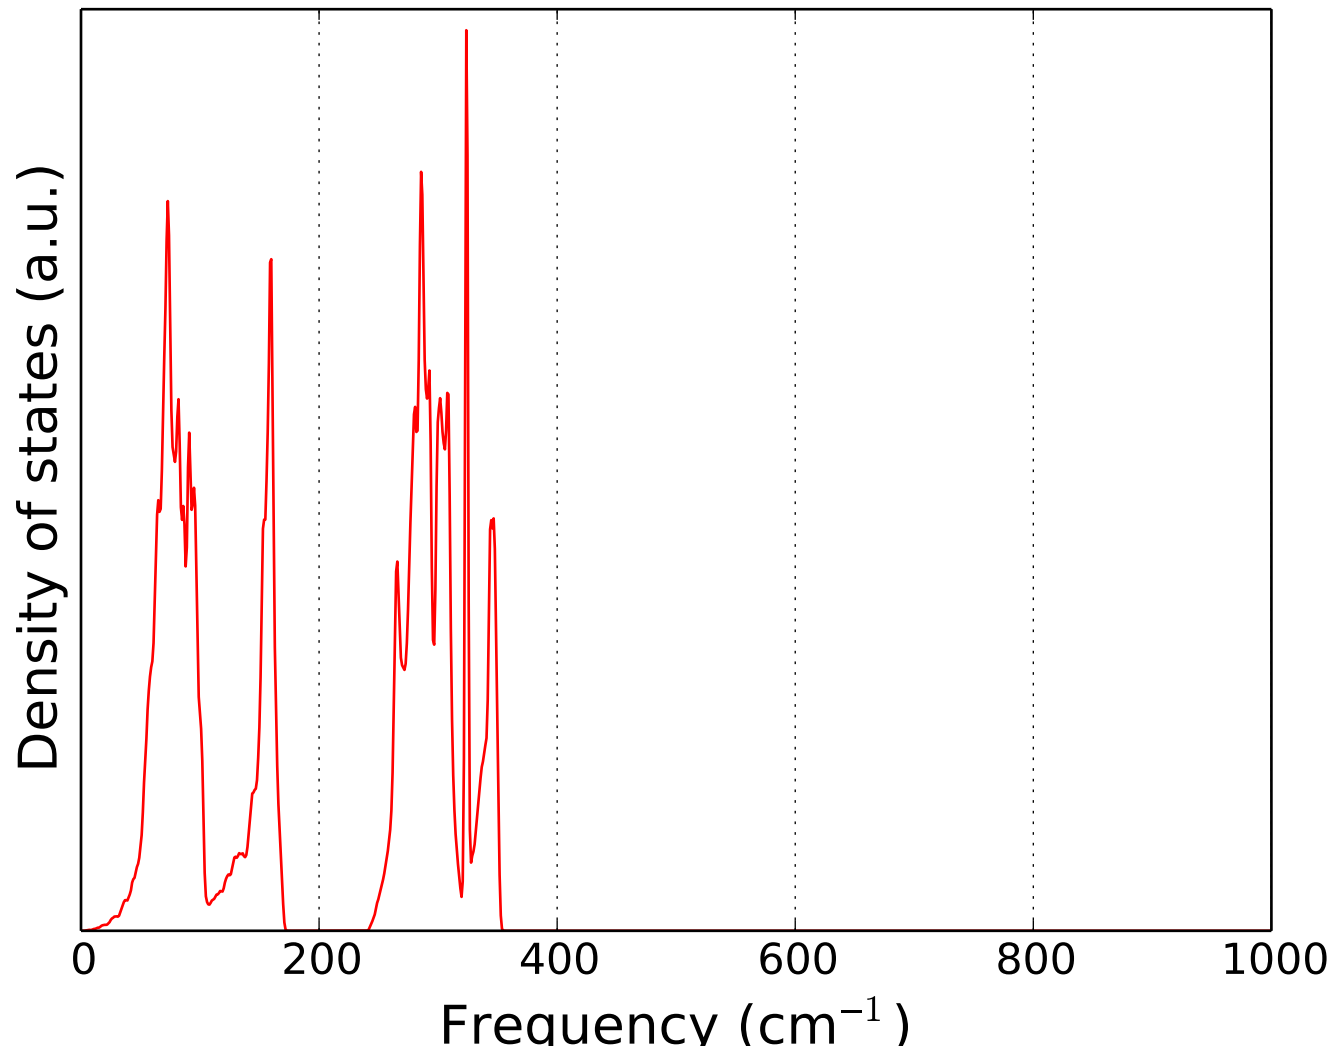

Supplement: c4ta00892h1.zip [file c4ta00892h1.zip]

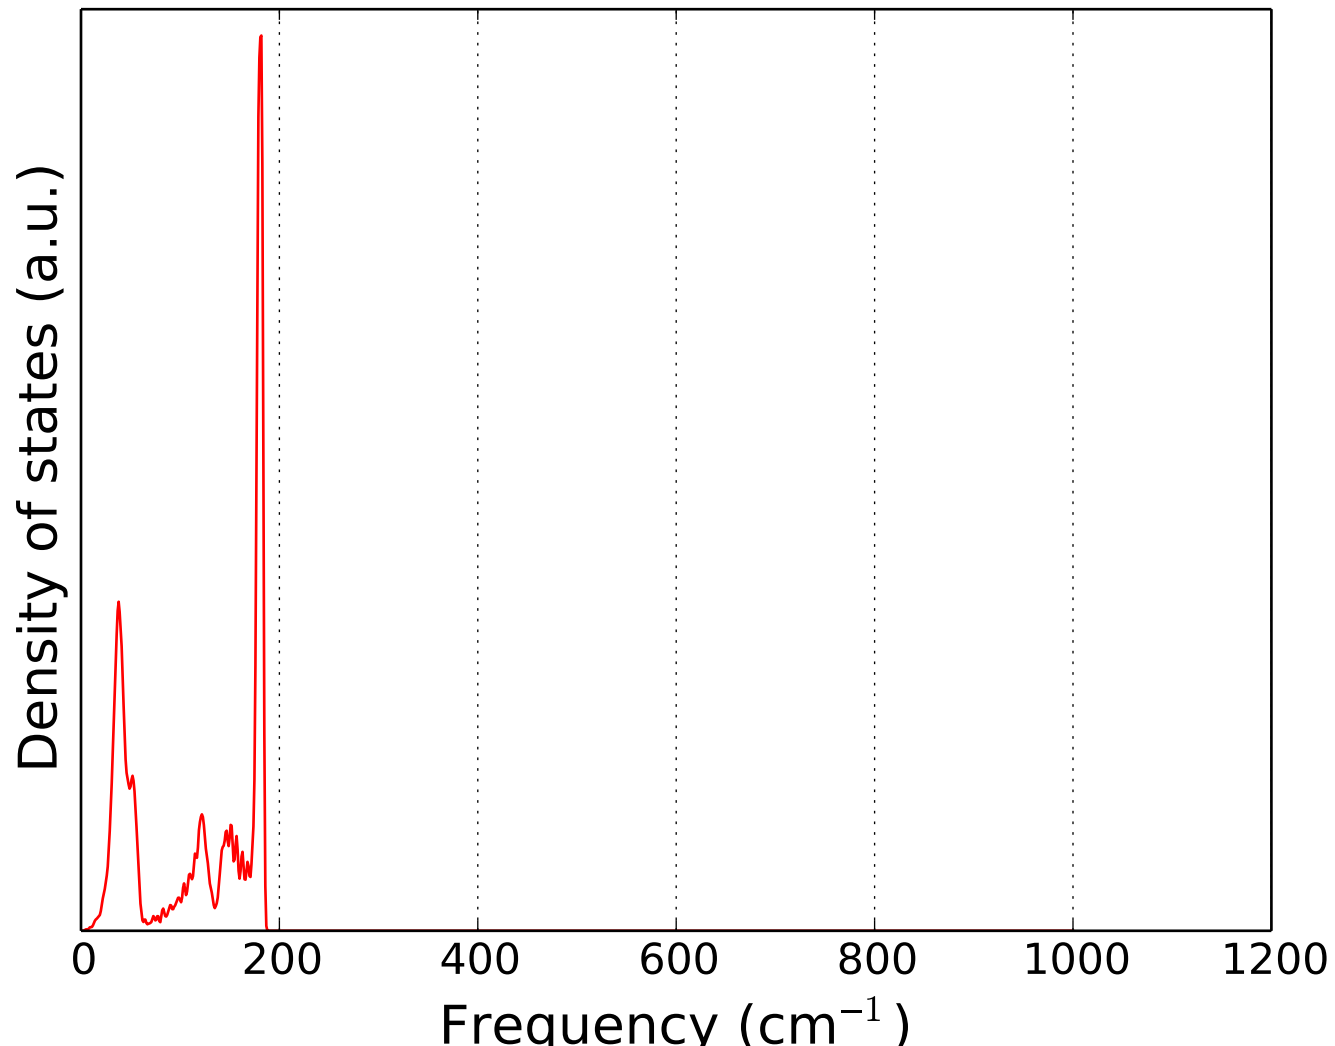

Supplement: c4ta00892h1.zip [file c4ta00892h1.zip]

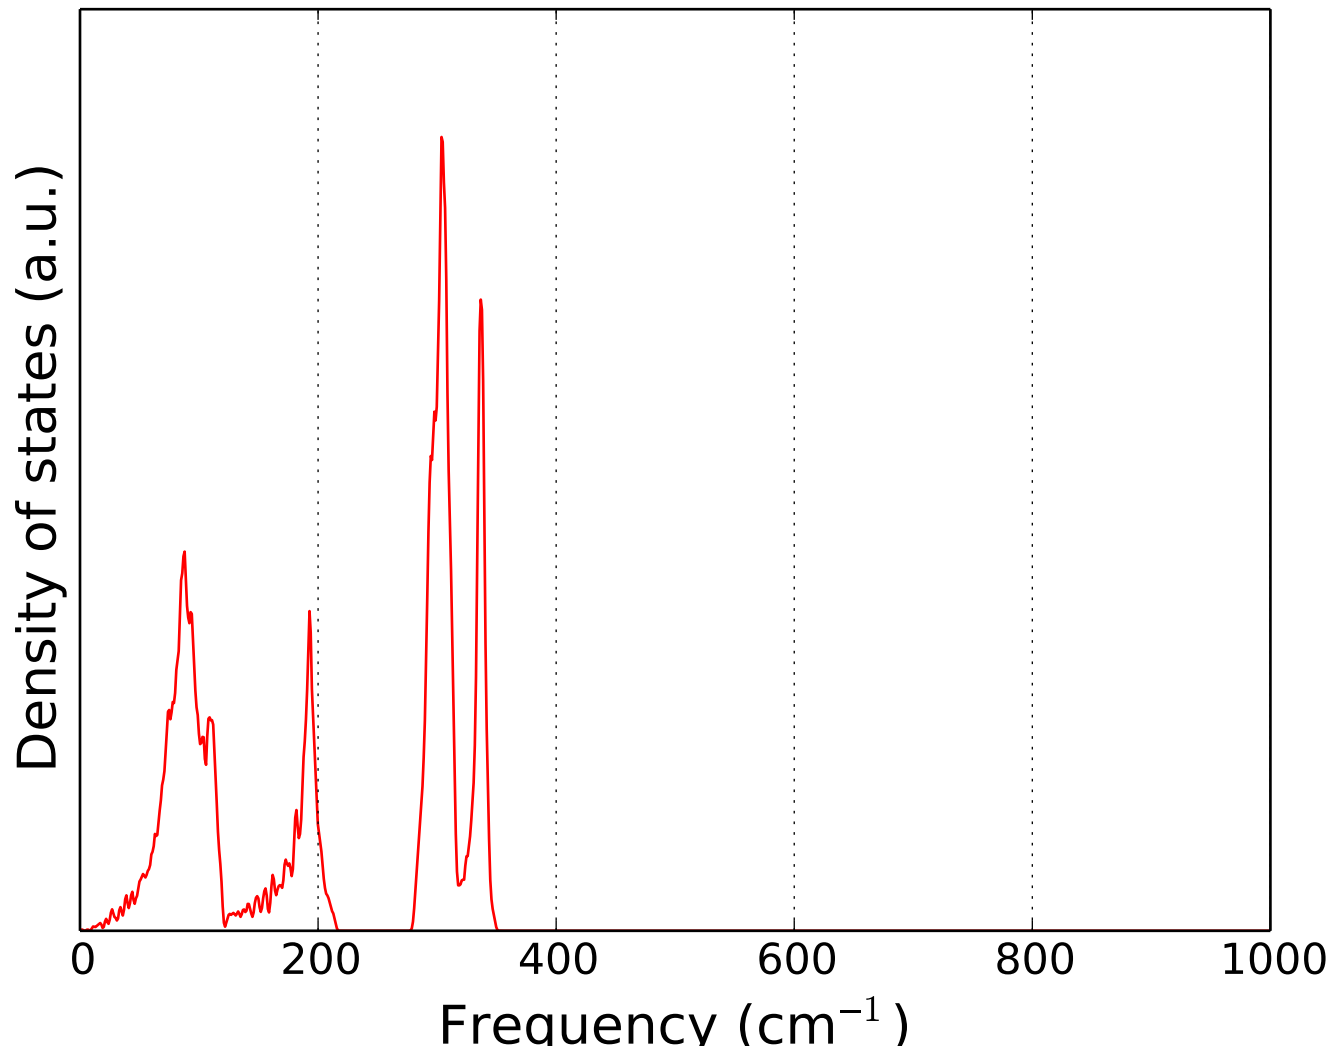

Supplement: c4ta00892h1.zip [file c4ta00892h1.zip]

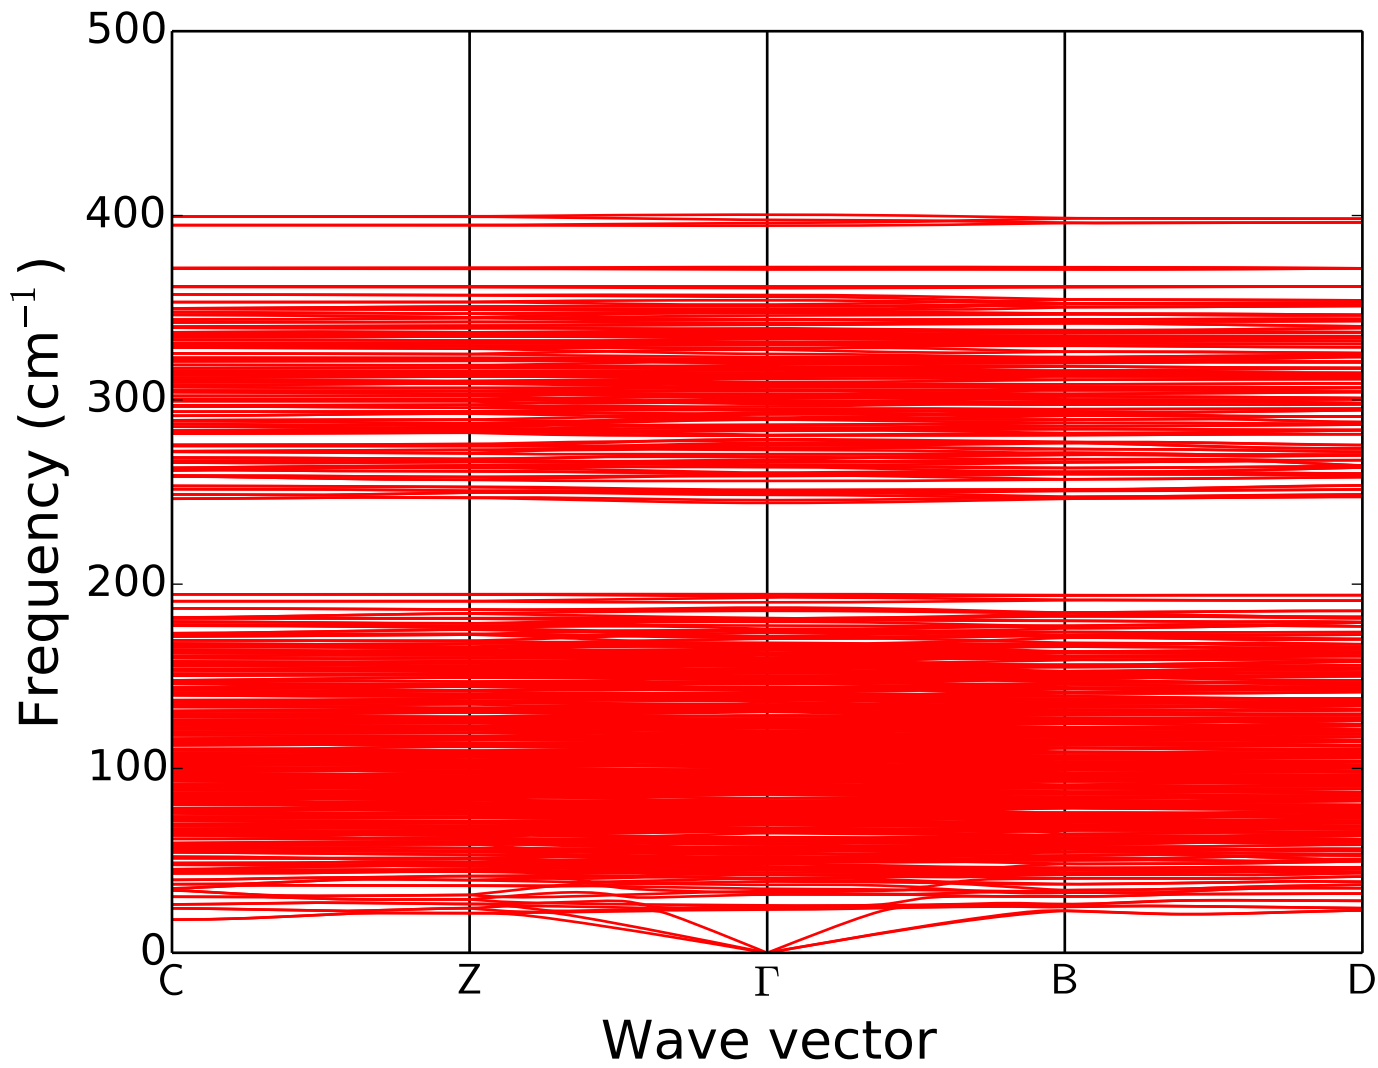

Supplement: c4ta00892h1.zip [file c4ta00892h1.zip]
